# Supplementary material for: High sensitivity and fast response self-powered solar-blind ultraviolet photodetector with a β-Ga2O3/spiro-MeOTAD p–n heterojunction
Source: Royal Society of Chemistry journal article supplement (doi:10.1039/c9tc06767a), 2020-01-01
Supplement: c9tc06767a1.pdf [file c9tc06767a1.pdf]

# Supplementary Information

## High Sensitivity and Fast Response Self-Powered Solar-Blind Ultraviolet Photodetector with $\beta$ -Ga<sub>2</sub>O<sub>3</sub>/Spiro-MeOTAD p-n Heterojunction

Zuyong yan<sup>a,b</sup>, shan li<sup>a,b</sup>, Zeng Liu<sup>a,b</sup>, yusong zhi<sup>a,b</sup>, Jie Dai<sup>a,b</sup>, xiangyu sun<sup>b</sup>, Siyuan Sun<sup>a,b</sup>, daoyou guo<sup>a,b</sup>, xia wang<sup>a,b</sup>, peigang li<sup>\*,a,b</sup>, zhenping wu<sup>a,b</sup>, Lily Li<sup>c</sup>, weihua tang<sup>\*,a,b</sup>

<sup>a</sup> Laboratory of information functional materials and devices, school of science, Beijing university of posts and telecommunications, Beijing 100876, china.

<sup>b</sup> State key laboratory of information photonics and optical communications, Beijing university of posts and telecommunications, Beijing 100876, china.

<sup>c</sup> Department of Physics, The State University of New York at Potsdam, Potsdam, NY 13676, USA.

\*E-mail: pgli@bupt.edu.cn.

\*E-mail: whtang@bupt.edu.cn.

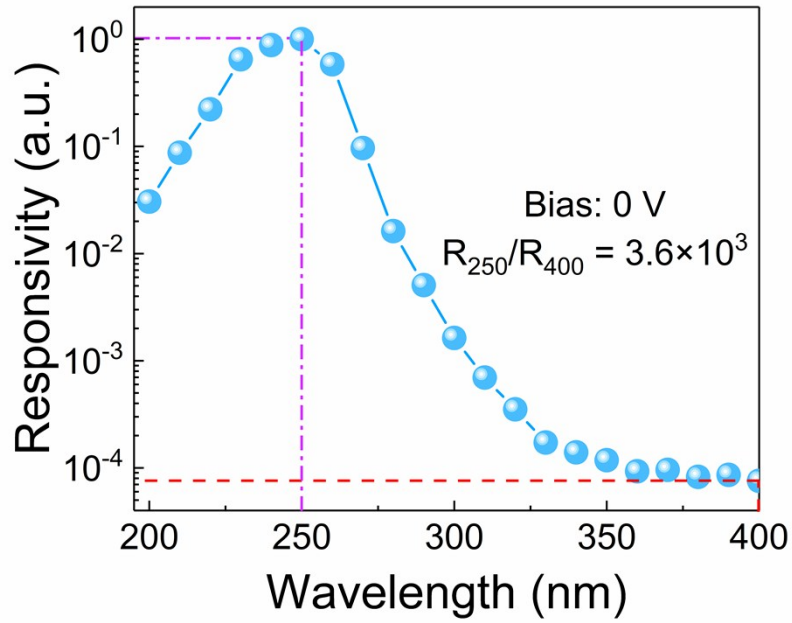

**Figure S1.** the spectral responsivity in logarithmic scale

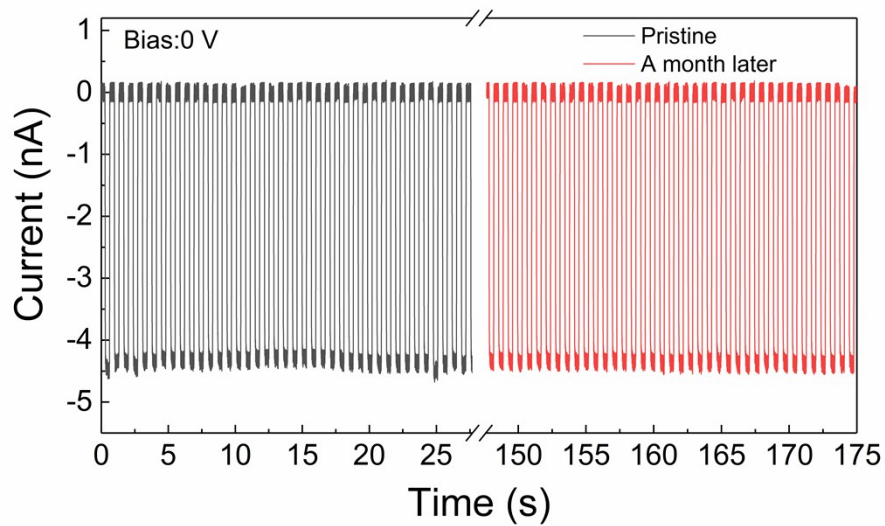

**Figure S2.** Comparison of time-dependent response of the Ga<sub>2</sub>O<sub>3</sub>/Spiro-MeOTAD p-n junction device before and after one month under zero bias

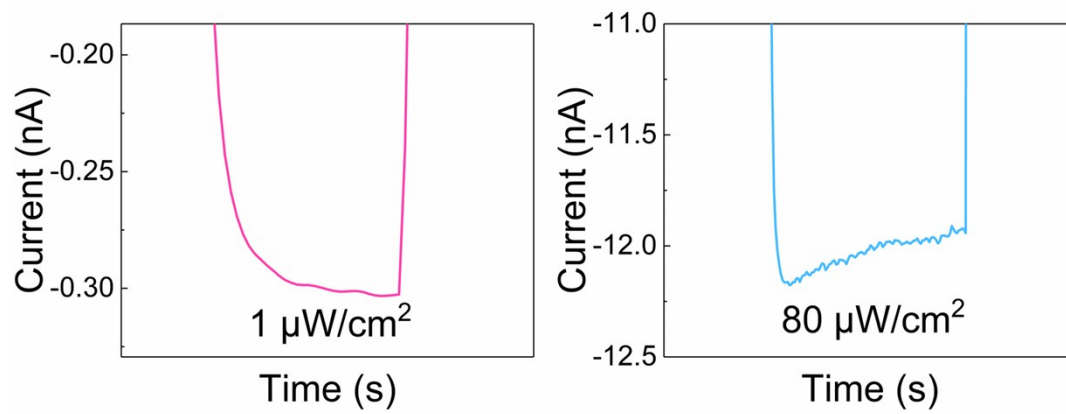

**Figure S3.** The shapes of photocurrent curves with a rounded head under UV light with the power intensity of  $1 \mu\text{W}/\text{cm}^2$  and a wedgy head under  $80 \mu\text{W}/\text{cm}^2$ .
